# Supplementary material for: Deep Circular RNA Sequencing Provides Insights into the Mechanism Underlying Grass Carp Reovirus Infection
Source: MDPI journal article supplement (doi:10.3390/ijms18091977), 2017-09-14
Supplement: s1 [file s1]

**Table S4. Primer sequences of 8 parental genes for RT-qPCR.**

| order | gene name      | primer sequence                                        | efficiency | Product length (bp) |
|-------|----------------|--------------------------------------------------------|------------|---------------------|
| 1     | <i>MIB1</i>    | GTGCTAACCAAGGCAAATGTCG<br>GCCCACCTTTCCAAGGGTTG         | 104.0%     | 183                 |
| 2     | <i>KAT6B</i>   | AGCCTGTCAAGGGTTTCGGTAG<br>GGCATGGTTTGGGTCTGGTTTA       | 103.1%     | 236                 |
| 3     | <i>ITGA8</i>   | CATGGGTCCTAGTCCGGTCAAT<br>CCACAGCCTACTCATCTCTTACA      | 92.9%      | 244                 |
| 4     | <i>HBAC</i>    | ATGATCTTATTGGTGAATGAGCG<br>CAGCGAGGGCAGCAGACAG         | 101.3%     | 192                 |
| 5     | <i>KCNC1</i>   | ACTACGCCGAAAGGATAGGAGC<br>CAATCACAGGAACAGGCATAGCA      | 91.0%      | 216                 |
| 6     | <i>F13A</i>    | GCACCTACATTCTGTCTTCCC<br>GGATGCCATAGGGCGTCA            | 96.8%      | 165                 |
| 7     | <i>HERC1</i>   | TCAAACCTACAGGGTGAGACAGAAGAG<br>CTGGTAACAGCCAGAAGAAATGC | 97.1%      | 176                 |
| 8     | <i>HERC4</i>   | AAAGGGCGGCACAGTATTCA<br>GACGATGCGACTGATACGAGTG         | 91.9%      | 165                 |
| 9     | <i>β-actin</i> | AGCCATCCTTCTTGGGTATG<br>GGTGGGGCGATGATCTTGAT           | 99.2%      | 211                 |

**Table S5. Divergent and convergent primer sequences of 15 selected circRNAs**

| Order | circRNAs ID   | Divergent primer (5'-3')                         | Convergent primer (5'-3')                         |
|-------|---------------|--------------------------------------------------|---------------------------------------------------|
| 1     | cid_circ_0069 | GATGTCCTGATTGTACTGGCAACA<br>CGCTCTGTCCTCAGCTTTGC | GAACCTGATCTCGTTTCTCTTTTG<br>CCCAGCGAGATGAACACAAAC |
| 2     | cid_circ_0547 | GCTGGATCGAATCGCTAGTATGA                          | GGTGACCATGCTAACTAGGGTTCTG                         |

|    |               |                                                        |                                                       |
|----|---------------|--------------------------------------------------------|-------------------------------------------------------|
|    |               | AAGGACACCCTCGTCGAGATG                                  | TAAACGGCCACGTCATGCAC                                  |
| 3  | cid_circ_1653 | TGGTGCTTACAAGTCTTTCGTGC<br>TTTCCGTTTTTTAGCACCTTGTATC   | AAGATACAAGGTGCTAAAAACGGAA<br>GGATGAGGAGACTGAGGAGGTAGA |
| 4  | cid_circ_3555 | CCGGTTACGCTCCTATAAGGTTTG<br>GTGATTACAGCCGGTCATGGG      | CCGTCAGTTACCCAGTGAATACAAA<br>GTTCCGGTCCTCCAGAGGTTTG   |
| 5  | cid_circ_4537 | CGACTCCAAATGGCAGAATGTC<br>GCTTCAAAGTCGCCATTGTTG        | AAATCTGCGACCCTGGACTCAC<br>TGGACATTCTGCCATTTGGAGT      |
| 6  | cid_circ_3204 | AAATAAAGATGCTGACCGTCTACCC<br>AGATTGTGTGCGAGGATCTTGAAG  | ATTTGAATGTTGGTAAGGGACGA<br>TATCTGTATTTATCAGCGAGGGCA   |
| 7  | cid_circ_1816 | AGACAGACTCCATTCAGGAGAGGTA<br>CCTCTGCCTGTTTTGCATCTCG    | AGGCAGAGGGCTTCCTCAATA<br>CGTCAGATACAAGTCTCCGTCCA      |
| 8  | cid_circ_2796 | GTTTCGAGTCTAAGAAGAAGCGATGA<br>AAAGGAAGCACAGGCCATATCTTT | CCTTCATCCTCCTCATTCCAGC<br>CTTGGCAAAAAGAAACACACGTC     |
| 9  | cid_circ_3277 | CGGACCGGTTCTGGAGGTG<br>CCGCCGACGTGACCTTTC              | GCTGAGGTCAAGGAGTTCGG<br>AGGAAGTTGGTGCTCTGGGTCT        |
| 10 | cid_circ_4726 | GGGCACTGGTCTTCACTCCTAC<br>GGGGCTTTTCCATCTCTGTACTT      | CGTGATTTCTGCCCTGGTGTTT<br>GAAGACCAGTGCCCAGCCTAAA      |
| 11 | cid_circ_0443 | TCTTTGCTCCATCCGATTCCC<br>GACGGTTTATGAGGTTCTGCCTG       | CTCTTTGTGGAGGTGATGTGATTG<br>GCTGGCGTGCTGCTGGATA       |
| 12 | cid_circ_1569 | AAGTTCTTGCCCATTTACAACCC<br>GCAACCACCATCTAGCACCTC       | CAAATGAGCAGGAGTCCAAGC<br>GAGGAAGTTAGTGCTTTGCGTTTT     |
| 13 | cid_circ_2061 | GTACCAGTACACCGCTCCCTCTT<br>GATCTGCACGGACCGCTG          | GTGCCCTGAAACAGCAGAAGA<br>CTCCAGCACCAGCGGGG            |
| 14 | cid_circ_2287 | TCTTACCTCTCAGAGAATGCTGGAG<br>GCAGTAGAGGGTCTTGAAGTAGCG  | CAGGAACAAGCCCAACGAGAA<br>GCTTATGTTGAGGGCGTCTTTG       |
| 15 | cid_circ_2960 | TACAACAACGGCAAATACAAGCA<br>CGCATCCTCTCACAGGAAGT        | CTGGCTGCGAGAAGAGGGTTT<br>CTGCTGCTTGTATTTGCCGTTG       |
